# Supplementary material for: Application of Reverse Micelle Sol–Gel Synthesis for Bulk Doping and Heteroatoms Surface Enrichment in Mo-Doped TiO2 Nanoparticles
Source: PubMed Central journal article supplement (PMC6471443; doi:10.3390/ma12060937), 2019-03-21
Supplement: materials-12-00937-s001.pdf [file materials-12-00937-s001.pdf]

# Application of Reverse Micelle Sol–Gel Synthesis for Bulk Doping and Heteroatoms Surface Enrichment in Mo-Doped TiO<sub>2</sub> Nanoparticles

Roberto Nasi <sup>1</sup>, Serena Esposito <sup>1</sup>, Francesca S. Freyria <sup>1</sup>, Marco Armandi <sup>1</sup>, Tanveer A. Gadhi <sup>2</sup>, Simelys Hernandez <sup>1,3</sup>, Paola Rivolo <sup>1</sup>, Nicoletta Ditaranto <sup>4</sup> and Barbara Bonelli <sup>1,5,\*</sup>

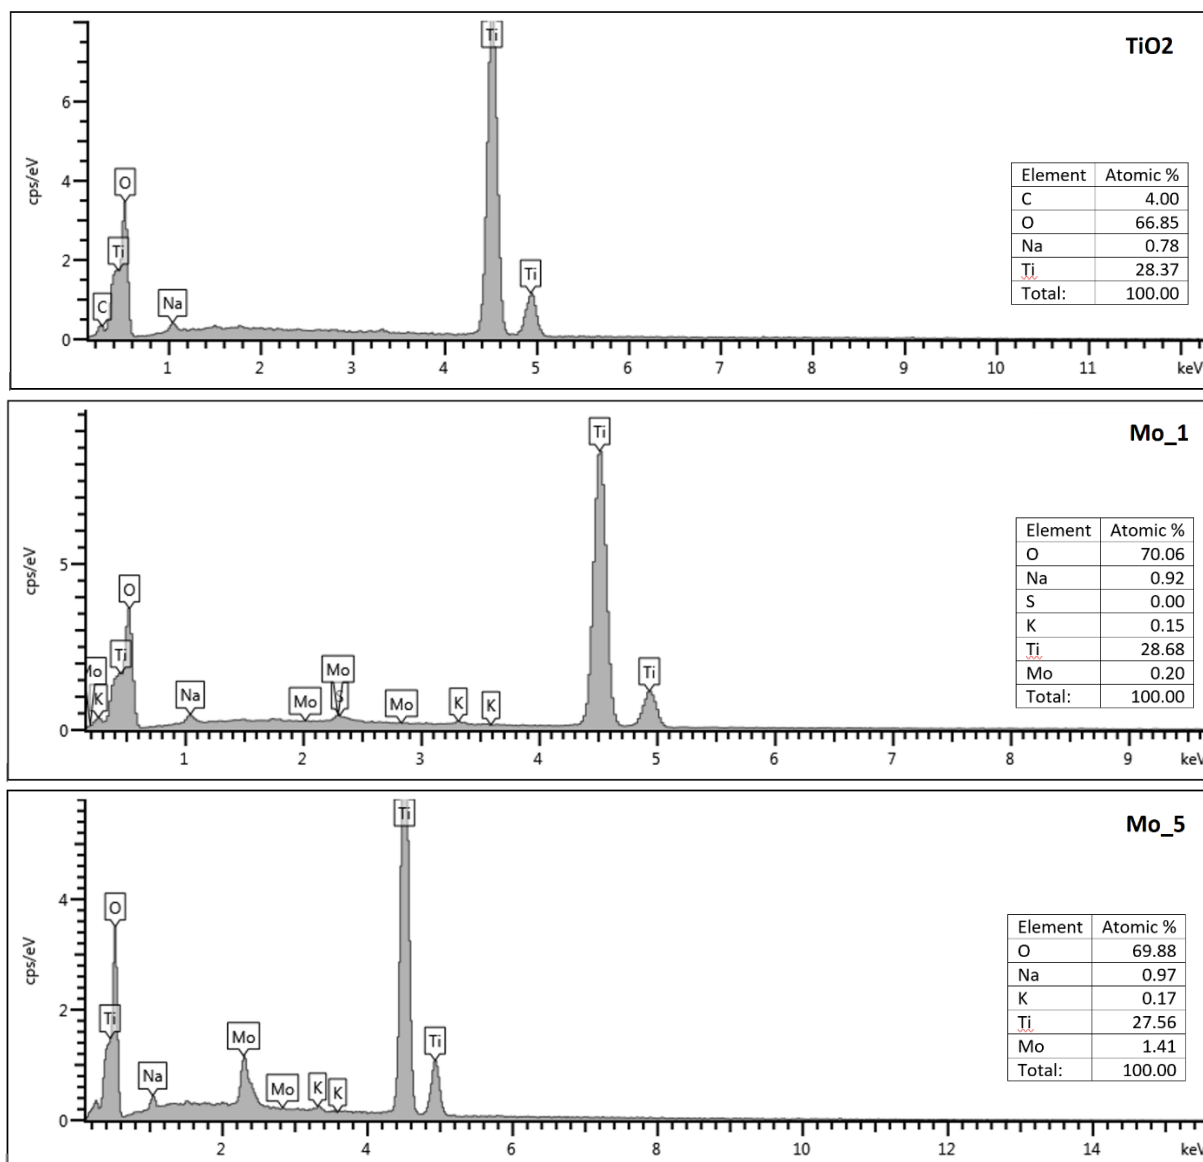

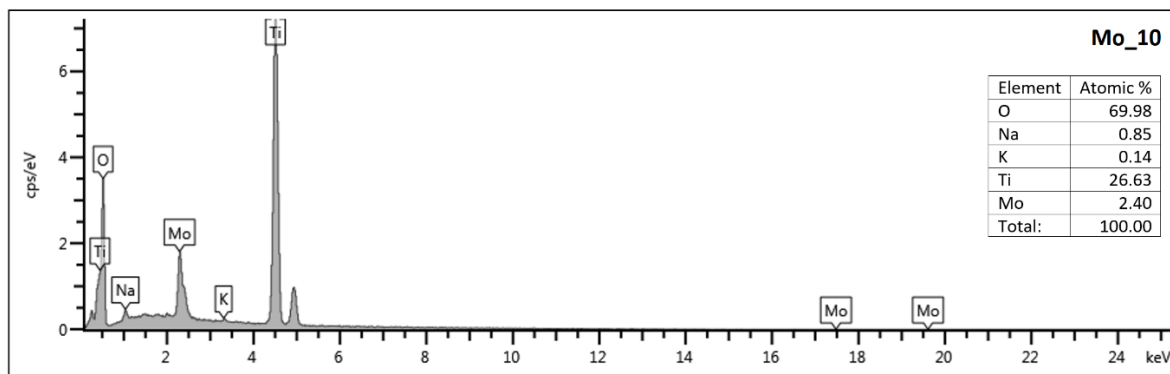

Figure S1. EDX spectra of the studied samples.

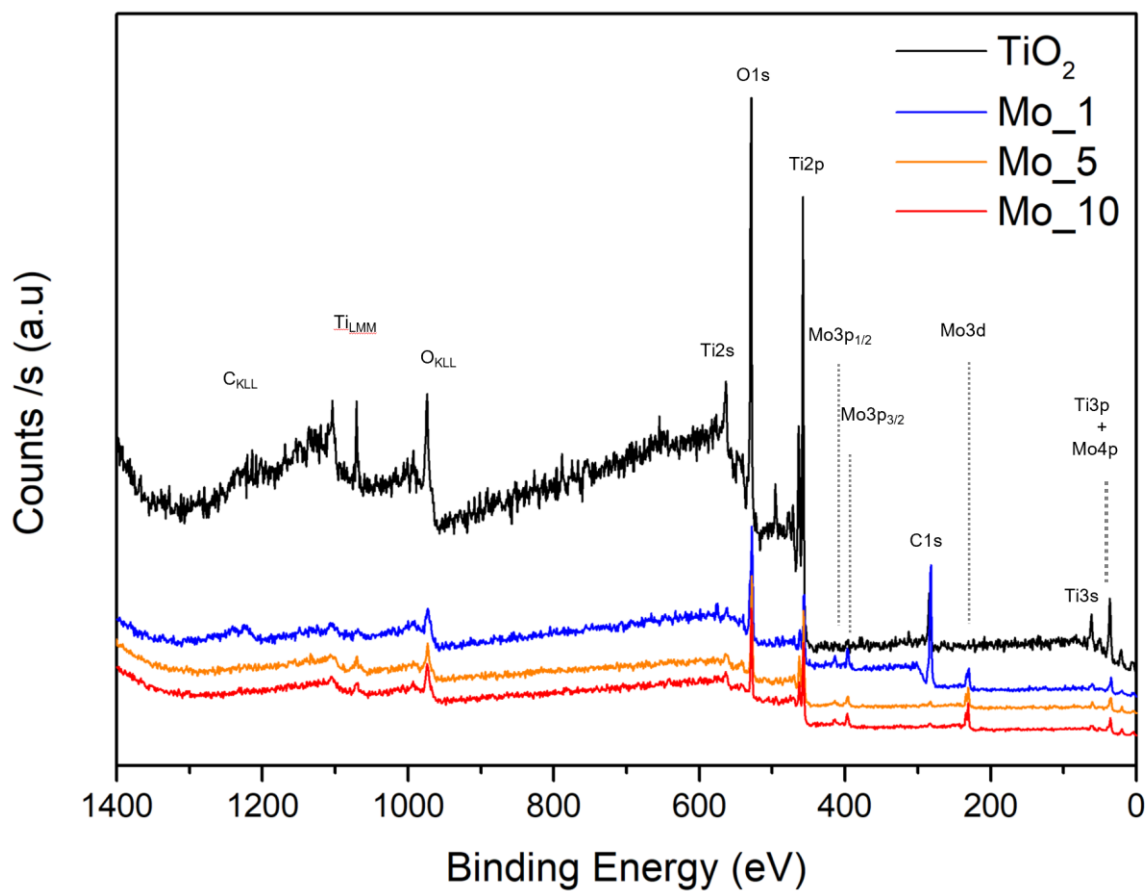

Figure S2. XPS survey spectra of the studied samples [41].
